# Supplementary material for: The cisplatin-induced lncRNA PANDAR dictates the chemoresistance of ovarian cancer via regulating SFRS2-mediated p53 phosphorylation
Source: PubMed Central journal article supplement (PMC6207559; doi:10.1038/s41419-018-1148-y), 2018-10-30

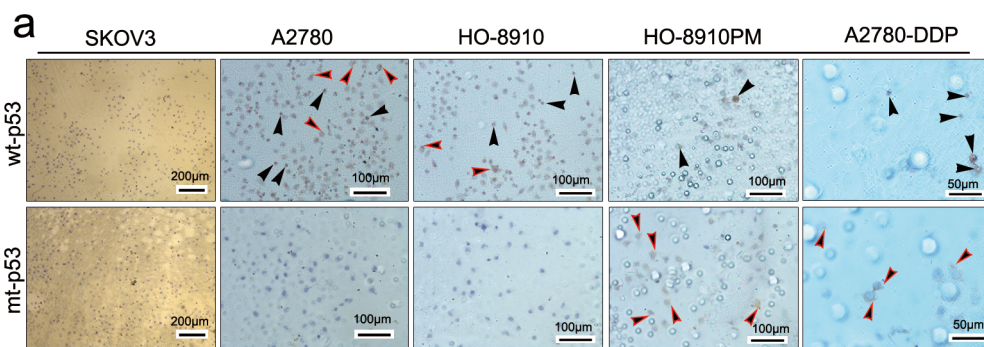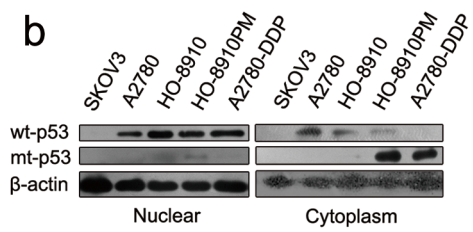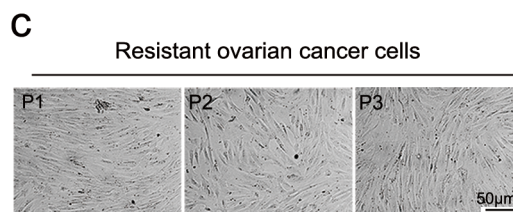

Supplement: 41419_2018_1148_MOESM1_ESM.pdf [file 41419_2018_1148_MOESM1_ESM.pdf]
